# Supplementary material for: Exploring the Aroma Fingerprint of Various Chinese Pear Cultivars through Qualitative and Quantitative Analysis of Volatile Compounds Using HS-SPME and GC×GC-TOFMS
Source: MDPI journal article supplement (doi:10.3390/molecules28124794), 2023-06-15
Supplement: s1 [file s1]

**Table S2 “ABC” value of scent of aroma substances in different cultivars of *Pyrus ussuriensis* Maxim**

[illegible]

[illegible]

|                                                     |      |    |   |    |    |    |    |    |    |    |   |    |    |    |    |    |    |    |   |   |   |    |    |    |   |
|-----------------------------------------------------|------|----|---|----|----|----|----|----|----|----|---|----|----|----|----|----|----|----|---|---|---|----|----|----|---|
| Diisobutyl<br>phthalate                             | 10   | -  | - | -  | -  | -  | -  | -  | 10 | -  | - | -  | -  | 10 | 10 | 20 | 30 | -  | - | - | - | -  | -  | 20 | - |
| Hexyl propionate                                    | 100  | 10 | - | -  | 20 | -  | 40 | 10 | -  | -  | - | -  | -  | -  | 10 | 10 | -  | -  | - | - | - | -  | -  | -  | - |
| 1-Hexanol                                           | 100  | 20 | - | -  | -  | -  | 70 | 10 | -  | -  | - | -  | -  | -  | -  | -  | -  | -  | - | - | - | -  | -  | -  | - |
| 1-Octanol                                           | 100  | 70 | - | -  | 15 | -  | 15 | -  | -  | -  | - | -  | -  | -  | -  | -  | -  | -  | - | - | - | -  | -  | -  | - |
| <i>n</i> -Heptanol                                  | 120  | 10 | - | -  | -  | 10 | 10 | 10 | -  | -  | - | -  | 10 | -  | -  | -  | -  | 50 | - | - | - | -  | -  | -  | - |
| 1-Nonanol                                           | 100  | 75 | - | 20 | 5  | -  | -  | -  | -  | -  | - | -  | -  | -  | -  | -  | -  | -  | - | - | - | -  | -  | -  | - |
| ( <i>E</i> )-2-Hexen-1-ol                           | 1000 | -  | - | -  | -  | 20 | 5  | 70 | -  | -  | - | -  | -  | -  | -  | -  | -  | -  | - | - | - | 5  | -  | -  | - |
| (3 <i>Z</i> ,6 <i>E</i> )-3,7,11-trimethyl-2-octene | 180  | 10 | - | -  | -  | -  | -  | 10 | 10 | -  | - | 30 | -  | -  | -  | 10 | -  | -  | - | - | - | -  | 30 | -  | - |
| ( <i>E</i> )- $\beta$ -Farnesene                    | 180  | 10 | - | -  | -  | -  | -  | 10 | 10 | -  | - | 30 | -  | -  | -  | 10 | -  | -  | - | - | - | -  | 30 | -  | - |
| Limonene                                            | 120  | -  | - | 80 | -  | -  | 20 | -  | -  | -  | - | -  | -  | -  | -  | -  | -  | -  | - | - | - | -  | -  | -  | - |
| $\beta$ -Myrcene                                    | 250  | -  | - | 30 | -  | -  | -  | -  | 30 | -  | - | 20 | -  | -  | -  | -  | 20 | -  | - | - | - | -  | -  | -  | - |
| ( <i>E</i> )- $\beta$ -Ocimene                      | 500  | -  | - | -  | -  | -  | -  | -  | 60 | -  | - | -  | -  | -  | -  | 8  | -  | -  | 3 | - | - | -  | -  | -  | - |
| Hexanal                                             | 700  | 60 | - | -  | -  | -  | 20 | 10 | -  | -  | - | -  | -  | -  | -  | -  | -  | -  | - | - | - | 10 | -  | -  | - |
| Nonanal                                             | 550  | 60 | - | 10 | -  | -  | -  | 10 | -  | 10 | - | -  | -  | -  | -  | -  | 10 | -  | - | - | - | -  | -  | -  | - |
| Octanal                                             | 1000 | 60 | - | 35 | -  | -  | -  | 5  | -  | -  | - | -  | -  | -  | -  | -  | -  | -  | - | - | - | -  | -  | -  | - |
| Heptanal                                            | 700  | 75 | - | 10 | -  | -  | -  | 10 | 5  | -  | - | -  | -  | -  | -  | -  | -  | -  | - | - | - | -  | -  | -  | - |
| Decanal                                             | 1000 | 80 | - | 10 | -  | -  | -  | -  | -  | -  | - | -  | -  | -  | -  | -  | 10 | -  | - | - | - | -  | -  | -  | - |
| ( <i>E</i> )-2-Nonenal                              | 800  | 80 | - | -  | 20 | -  | -  | -  | -  | -  | - | -  | -  | -  | -  | -  | -  | -  | - | - | - | -  | -  | -  | - |
| Benzeneacetaldehyde                                 | 400  | -  | - | -  | -  | -  | -  | 50 | -  | -  | - | -  | -  | -  | 20 | -  | -  | -  | - | - | - | 30 | -  | -  | - |

[illegible]
