# Supplementary material for: Exploring the Aroma Fingerprint of Various Chinese Pear Cultivars through Qualitative and Quantitative Analysis of Volatile Compounds Using HS-SPME and GC×GC-TOFMS
Source: MDPI journal article supplement (doi:10.3390/molecules28124794), 2023-06-15
Supplement: s1 [file s1]

**Table S3 Aroma value of different cultivars of *Pyrus ussuriensis* Maxim**

| Aroma types | Anli                   | Dongmili               | Huagai               | Jianbali               | Jingbaili            | Jinxiangshui           | Nanguoli             |
|-------------|------------------------|------------------------|----------------------|------------------------|----------------------|------------------------|----------------------|
| A           | 917861.35±147128.64    | 6006710.18±375645.36   | 229751.84±42714.78   | 1760711.17±92523.64    | 1326204.22±131822.10 | 905454.08±116593.39    | 732088.62±47090.15   |
| B           | 54264.00±1797.31       | 75773.51±5587.15       | 137.01±86.14         | 156261.92±9709.28      | 121.11±13.75         | 19403.99±3798.62       | 170837.08±17053.30   |
| C           | 7640.60±1215.66        | 34508.52±3727.26       | 14598.17±1902.61     | 6991.46±595.12         | 17273.67±2986.94     | 949.49±171.23          | 10694.67±1144.17     |
| D           | 713312.23±52884.74     | 623973.41±77833.78     | 158447.52±13697.65   | 830619.23±61897.56     | 169876.99±25207.61   | 1693228.17±258905.91   | 247983.10±28791.69   |
| E           | 234218.00±33944.96     | 107795.61±11144.50     | 71628.36±9255.07     | 119458.69±21706.67     | 237928.34±39391.96   | 437786.67±89054.18     | 72463.27±9312.62     |
| F           | 20498269.76±2840197.99 | 22849652.84±2174243.98 | 4521531.23±363710.40 | 13292619.10±1539003.35 | 3006795.19±305300.82 | 24920107.24±4379968.95 | 4001065.52±488216.76 |
| G           | 1279813.16±117251.54   | 3657290.07±128255.51   | 507916.69±83468.83   | 1367121.60±92695.17    | 1142459.67±138465.71 | 2673102.13±428130.80   | 493499.72±78293.70   |
| H           | 8195.26±1163.33        | 28426.27±195.78        | 878.16±96.67         | 6230.71±633.11         | 7287.76±1521.60      | 953.82±72.21           | 13739.96±3126.89     |
| I           | 0.00                   | 0.00                   | 0.00                 | 0.00                   | 0.00                 | 0.00                   | 9.08±0.56            |
| J           | 0.00                   | 0.00                   | 0.00                 | 0.00                   | 0.00                 | 0.00                   | 0.00                 |
| K           | 24585.77±3489.98       | 1878.80±587.34         | 2025.41±151.43       | 17505.74±1772.47       | 18957.65±3745.59     | 664.60±130.66          | 35050.72±7904.19     |
| L           | 81605.94±3221.52       | 156180.52±32879.99     | 64916.56±10520.70    | 196270.90±13347.86     | 200893.64±57107.38   | 159448.09±35948.37     | 29760.91±6837.68     |
| M           | 7194.03±522.94         | 0.00                   | 179.55±36.31         | 1967.67±54.59          | 0.00                 | 0.00                   | 3173.39±642.41       |
| N           | 161159.79±1479.13      | 25484.11±3934.16       | 5758.30±2653.05      | 117113.25±1659.66      | 3524.15±785.25       | 287386.15±42327.91     | 12187.46±1450.98     |
| O           | 14615.26±2002.05       | 39872.83±1525.11       | 10286.61±544.66      | 5835.25±590.82         | 6976.13±1519.28      | 8029.99±433.89         | 47293.89±9381.04     |
| P           | 8104.50±622.62         | 527.50±14.70           | 78.39±5.08           | 2458.48±87.28          | 69.06±2.23           | 115.06±1.87            | 3470.01±672.89       |
| Q           | 0.00                   | 0.00                   | 51.14±7.26           | 0.00                   | 0.00                 | 0.00                   | 236.42±3.57          |
| R           | 10381.43±1166.22       | 94510.29±923.91        | 4375.89±638.18       | 7050.37±427.29         | 1309.75±78.85        | 3519.30±377.89         | 11540.62±1851.31     |
| S           | 0.00                   | 0.00                   | 0.00                 | 0.00                   | 0.00                 | 0.00                   | 0.00                 |
| T           | 0.00                   | 0.00                   | 0.00                 | 0.00                   | 0.00                 | 0.00                   | 54.50±3.35           |
| U           | 28812.50±712.67        | 3049.09±331.80         | 429.62±57.94         | 42030.06±2918.32       | 867.91±121.32        | 2940.76±429.71         | 54250.45±514.45      |
| V           | 6255.68±454.73         | 0.00                   | 7420.20±1347.81      | 21154.03±3356.23       | 34532.17±5472.66     | 0.00                   | 2497.68±514.49       |
| W           | 131179.67±23822.30     | 296360.54±27411.69     | 177739.67±31325.48   | 253302.75±13797.93     | 204966.06±19192.06   | 112769.37±15304.10     | 57237.38±8518.95     |
| X           | 0.00                   | 0.00                   | 0.00                 | 0.00                   | 0.00                 | 0.00                   | 18.17±1.12           |
| Y           | 63275.73±3149.62       | 159211.83±22139.00634  | 42382.50±6880.70     | 136063.83±9273.34      | 131293.21±37332.72   | 106329.75±23582.20     | 44674.51±4824.84     |
| Z           | 474705.47±33273.45     | 431453.40±50807.30     | 133808.94±22530.40   | 301043.36±24279.28     | 303373.70±42881.54   | 1074298.66±221904.64   | 363474.24±49626.14   |
| total       | 24725450.11            | 34564859.30            | 5954341.79           | 18641809.55            | 6814710.36           | 32406487.31            | 6407301.40           |
