# Supplementary material for: Exploring the Aroma Fingerprint of Various Chinese Pear Cultivars through Qualitative and Quantitative Analysis of Volatile Compounds Using HS-SPME and GC×GC-TOFMS
Source: MDPI journal article supplement (doi:10.3390/molecules28124794), 2023-06-15
Supplement: s1 [file s1]

**Table S4 Primary substances contributing to the grouping**

| Number | Major contributing substance                                        | M1.p(corr)[1] | M1.p(corr)[2] | Coordinate position |
|--------|---------------------------------------------------------------------|---------------|---------------|---------------------|
| 1      | Ethyl tiglate                                                       | 0.362788      | 0.231943      | Frist quadrant      |
| 2      | ( <i>E</i> )-2-Hexen-1-ol                                           | 0.268774      | 0.727948      | Frist quadrant      |
| 3      | ( <i>E</i> )-2-Hexenoic acid, methyl ester                          | 0.249096      | 0.200189      | Frist quadrant      |
| 4      | Prenyl acetate                                                      | 0.150338      | 0.354875      | Frist quadrant      |
| 5      | Methyl 2-ethylacrylate                                              | 0.149899      | 0.354798      | Frist quadrant      |
| 6      | Dimethyl carbonate                                                  | 0.14983       | 0.354118      | Frist quadrant      |
| 7      | Ethyl crotonate                                                     | 0.149492      | 0.352725      | Frist quadrant      |
| 8      | Methyl isobutyrate                                                  | 0.149485      | 0.354454      | Frist quadrant      |
| 9      | ( <i>E</i> )-2,4-Decadienal                                         | 0.14934       | 0.354802      | Frist quadrant      |
| 10     | Croton aldehyde                                                     | 0.148406      | 0.353875      | Frist quadrant      |
| 11     | ( <i>E</i> )-1-Methyl-4-(6-methylhept-5-en-2-ylidene)cyclohex-1-ene | 0.147482      | 0.353216      | Frist quadrant      |
| 12     | ( <i>E</i> )-3-Hexene                                               | 0.140929      | 0.328796      | Frist quadrant      |
| 13     | Methyl decanoate                                                    | 0.286095      | 0.518979      | Frist quadrant      |
| 14     | Heptanal                                                            | 0.274307      | 0.453346      | Frist quadrant      |
| 15     | 3-Methyl-Tridecane                                                  | 0.269399      | 0.576113      | Frist quadrant      |
| 16     | 2-Methylbutyl acetate                                               | 0.175136      | 0.682395      | Frist quadrant      |
| 17     | Diethyl carbonate                                                   | 0.145923      | 0.738236      | Frist quadrant      |
| 18     | ( <i>Z</i> )-4-Octenoic acid, ethyl ester                           | -0.924956     | 0.215929      | Third quadrant      |
| 19     | ( <i>E,Z</i> )-2,4-Decadienoic acid, ethyl ester                    | -0.744156     | 0.193764      | Third quadrant      |
| 20     | ( <i>Z</i> )-3-Octenoic acid, ethyl ester                           | -0.947742     | 0.151031      | Third quadrant      |
| 21     | 4-Octenoic acid, methyl ester -                                     | 0.782716      | 0.125507      | Third quadrant      |
| 22     | ( <i>Z</i> )-4-Decenoic acid, methyl ester                          | 0.937014      | 0.120803      | Third quadrant      |
| 23     | Ethyl heptanoate                                                    | -0.938498     | 0.103721      | Third quadrant      |

|    |                                            |           |            |                |
|----|--------------------------------------------|-----------|------------|----------------|
| 24 | Hexyl hexanoate                            | -0.881531 | 0.0323526  | Third quadrant |
| 25 | 2-Hexenal                                  | -0.970689 | -0.0294891 | Third quadrant |
| 26 | 1-Nonanol                                  | -0.776681 | -0.0494806 | Third quadrant |
| 27 | ( <i>Z,Z</i> )- $\alpha$ -farnesene        | -0.836397 | -0.0545352 | Third quadrant |
| 28 | Hexyl caprylate                            | -0.970932 | -0.0606929 | Third quadrant |
| 29 | 2-Methyl propenal                          | -0.976909 | -0.0615247 | Third quadrant |
| 30 | 5-Hexenoic acid, methyl ester              | -0.977157 | -0.0616024 | Third quadrant |
| 31 | ( <i>E</i> )- $\beta$ -ocimene             | -0.977484 | -0.0616259 | Third quadrant |
| 32 | Methyl 3-methylthiopropionate              | -0.975956 | -0.0616632 | Third quadrant |
| 33 | Hexyl pentanoate                           | -0.975722 | -0.0616714 | Third quadrant |
| 34 | 4-Ethyl-1,2-dimethyl-Benzene               | -0.977528 | -0.0617072 | Third quadrant |
| 35 | 3-(Methylthio)propanoic acid ethyl ester   | -0.976938 | -0.0617703 | Third quadrant |
| 36 | ( <i>Z</i> )-4-Decenoic acid, ethyl ester  | -0.9775   | -0.0618425 | Third quadrant |
| 37 | Hex-5-enoic acid, ethyl ester              | -0.977538 | -0.061868  | Third quadrant |
| 38 | 2-Methylpropyl hexanoate                   | -0.976229 | -0.0619355 | Third quadrant |
| 39 | $\beta$ -myrcene                           | -0.97774  | -0.0619785 | Third quadrant |
| 40 | Butanoic acid, 2-methylpropyl ester        | -0.977698 | -0.062056  | Third quadrant |
| 41 | Dodecanoic acid, ethyl ester               | -0.976101 | -0.0621399 | Third quadrant |
| 42 | Heptadecane                                | -0.800251 | -0.0974968 | Third quadrant |
| 43 | Limonene                                   | -0.930021 | -0.11968   | Third quadrant |
| 44 | ( <i>E</i> )-2-Nonenal                     | -0.927523 | -0.126258  | Third quadrant |
| 45 | 2-Nonanol                                  | -0.896911 | -0.130256  | Third quadrant |
| 46 | ( <i>Z</i> )-3-Octenoic acid, methyl ester | -0.890955 | -0.14788   | Third quadrant |
| 47 | Propyl hexanoate                           | -0.976458 | -0.148819  | Third quadrant |
| 48 | 2,6,10-Trimethyl-Dodecane                  | -0.857014 | -0.165258  | Third quadrant |
| 49 | Ethyl propionate                           | -0.884985 | -0.1957    | Third quadrant |

|    |                                          |           |            |                 |
|----|------------------------------------------|-----------|------------|-----------------|
| 50 | Octyl acetate                            | -0.878433 | -0.202295  | Third quadrant  |
| 51 | Hexyl butyrate                           | -0.790774 | -0.233174  | Third quadrant  |
| 52 | Isobutyl acetate                         | 0.387362  | -0.0469614 | Third quadrant  |
| 53 | (Z)-Hex-2-enyl acetate                   | 0.379671  | -0.28154   | Third quadrant  |
| 54 | Undecane                                 | 0.367192  | -0.0945826 | Third quadrant  |
| 55 | 2-Buten-1-ol, acetate                    | 0.355562  | -0.0957354 | Fourth quadrant |
| 56 | <i>n</i> -Heptanol                       | 0.349283  | -0.299904  | Fourth quadrant |
| 57 | 1-Octanol                                | 0.347826  | -0.352579  | Fourth quadrant |
| 58 | Methyl (Z)-hex-3-enoate                  | 0.329931  | -0.188992  | Fourth quadrant |
| 59 | 3-Methyl-3-buten-1-ol, acetate           | 0.311441  | -0.394704  | Fourth quadrant |
| 60 | (Z)-4-Decenoic acid, methyl ester        | 0.311315  | -0.39465   | Fourth quadrant |
| 61 | Methyl 2-methyl-2-butenolate             | 0.30978   | -0.393347  | Fourth quadrant |
| 62 | propyl ( <i>E</i> )-2-methylbut-2-enoate | 0.309408  | -0.391215  | Fourth quadrant |
| 63 | (Z)-3-Decen-1-yl acetate                 | 0.307106  | -0.390203  | Fourth quadrant |
| 64 | Heptyl acetate                           | 0.283893  | -0.413108  | Fourth quadrant |
| 65 | Methyl caproate                          | 0.243891  | -0.431191  | Fourth quadrant |
| 66 | 2-Methylbut-2-en-1-yl acetate            | 0.237211  | -0.24665   | Fourth quadrant |
| 67 | Denderalasin                             | 0.237125  | -0.246051  | Fourth quadrant |
| 68 | <i>o</i> -Cymene                         | 0.237108  | -0.247157  | Fourth quadrant |
| 69 | Methyl tiglate                           | 0.236964  | -0.247067  | Fourth quadrant |
| 70 | Methyl 3-(methylthio)-(E)-2-propenoate   | 0.236949  | -0.247344  | Fourth quadrant |
| 71 | Ethyl acetate                            | 0.236754  | -0.44709   | Fourth quadrant |
| 72 | Hexyl tiglate                            | 0.236393  | -0.247466  | Fourth quadrant |
| 73 | 1,2,3-Trimethyl-Benzene                  | 0.235831  | -0.244298  | Fourth quadrant |
| 74 | 3-Octanol                                | 0.235618  | -0.242729  | Fourth quadrant |
| 75 | Decane                                   | 0.23556   | -0.246452  | Fourth quadrant |

|    |                                                                  |           |            |                 |
|----|------------------------------------------------------------------|-----------|------------|-----------------|
| 76 | Propanoic acid, 2-methyl-, 3-hydroxy-2,2,4-trimethylpentyl ester | 0.235102  | -0.247208  | Fourth quadrant |
| 77 | 2,3-Octanedione                                                  | 0.23498   | -0.242619  | Fourth quadrant |
| 78 | 3-(4-Methylpent-3-enyl)furan                                     | 0.23498   | -0.243622  | Fourth quadrant |
| 79 | ( <i>E</i> )-3-hexenyl acetate                                   | 0.233659  | -0.0901543 | Fourth quadrant |
| 80 | Ethyl (2 <i>Z</i> )-but-2-enoate                                 | 0.230993  | -0.308653  | Fourth quadrant |
| 81 | 3,7,11-trimethyl-6,10-Dodecadien-1-ol                            | 0.23096   | -0.236737  | Fourth quadrant |
| 82 | 1,3,5,7-Cyclooctatetraene                                        | 0.213697  | -0.0750463 | Fourth quadrant |
| 83 | Methyl propionate                                                | 0.210413  | -0.423065  | Fourth quadrant |
| 84 | Hexyl acetate                                                    | 0.193771  | -0.163106  | Fourth quadrant |
| 85 | Ethyl caproate                                                   | 0.166617  | -0.0893755 | Fourth quadrant |
| 86 | Decyl acetate                                                    | 0.142533  | -0.435172  | Fourth quadrant |
| 87 | ( <i>Z</i> )-2-Hexen-1-ol                                        | 0.113955  | -0.390324  | Fourth quadrant |
| 88 | 4-Hexen-1-ol, acetate                                            | 0.113431  | -0.38932   | Fourth quadrant |
| 89 | $\alpha$ -curcumene                                              | 0.112893  | -0.386183  | Fourth quadrant |
| 90 | Hexadecane                                                       | 0.0247137 | -0.0742797 | Fourth quadrant |
| 91 | Ethyl ( <i>Z</i> )-hex-3-enoate                                  | 0.0243329 | -0.0739571 | Fourth quadrant |
| 92 | Isobutyl acetate                                                 | 0.387362  | -0.0469614 | Fourth quadrant |
| 93 | ( <i>Z</i> )-hex-2-enyl acetate                                  | 0.379671  | -0.28154   | Fourth quadrant |
| 94 | Undecane                                                         | 0.367192  | -0.0945826 | Fourth quadrant |

---
