# Supplementary material for: Exploring the Aroma Fingerprint of Various Chinese Pear Cultivars through Qualitative and Quantitative Analysis of Volatile Compounds Using HS-SPME and GC×GC-TOFMS
Source: MDPI journal article supplement (doi:10.3390/molecules28124794), 2023-06-15
Supplement: s1 [file s1]

**Table S1 Aroma composition and content of different cultivars of *Pyrus ussuriensis* Maxim**

| No.          | Volatile compounds              | <sup>1</sup> R.T. (s) | <sup>2</sup> RI | Anli<br>(ng/g)             | Dongmili<br>(ng/g)        | Huagai<br>(ng/g)          | Jianbali<br>(ng/g)                    | Jingbaili<br>(ng/g)       | Jinxiangshui<br>(ng/g)   | Nanguoli<br>(ng/g)        |
|--------------|---------------------------------|-----------------------|-----------------|----------------------------|---------------------------|---------------------------|---------------------------------------|---------------------------|--------------------------|---------------------------|
| Esters (102) |                                 |                       |                 |                            |                           |                           |                                       |                           |                          |                           |
| 1            | Hexyl acetate                   | 687, 1.280            | 1014.7          | 476.81±102.83 <sup>a</sup> | 120.98±16.47 <sup>b</sup> | 100.87±3.50 <sup>bc</sup> | <sup>3</sup> 37.25±6.57 <sup>cd</sup> | 46.26±1.92 <sup>cd</sup>  | 26.02±3.92 <sup>d</sup>  | 3.05±0.56 <sup>d</sup>    |
| 2            | Ethyl acetate                   | 132, 0.760            | 605.04          | 180.96±5.45 <sup>b</sup>   | 148.09±29.27 <sup>b</sup> | 40.06±5.56 <sup>cd</sup>  | 87.35±13.05 <sup>c</sup>              | 0.47±0.12 <sup>d</sup>    | 525.29±75.51             | 17.93±2.79 <sup>d</sup>   |
|              |                                 |                       |                 |                            |                           |                           |                                       |                           | a                        |                           |
| 3            | Isoamyl acetate                 | 435, 1.140            | 875.2           | <sup>4</sup> -             | -                         | -                         | 59.54±6.51 <sup>a</sup>               | -                         | -                        | -                         |
| 4            | Isobutyl acetate                | 276, 0.970            | 772.01          | -                          | 36.25±7.26 <sup>a</sup>   | 8.80±1.23 <sup>c</sup>    | 21.18±4.21 <sup>b</sup>               | 4.35±0.90 <sup>cd</sup>   | 8.82±1.65 <sup>c</sup>   | 5.05±0.73 <sup>cd</sup>   |
| 5            | Butyl acetate                   | 333, 1.100            | 814.49          | 147.93±17.93 <sup>c</sup>  | 314.82±43.60 <sup>b</sup> | 90.97±4.56 <sup>cd</sup>  | 84.99±7.98 <sup>cd</sup>              | 56.48±4.17 <sup>d</sup>   | 787.42±94.84             | 36.29±7.97 <sup>d</sup>   |
|              |                                 |                       |                 |                            |                           |                           |                                       |                           | a                        |                           |
| 6            | 2-Methylbutyl acetate           | 441, 1.120            | 878.76          | -                          | 15.96±1.43 <sup>b</sup>   | 13.13±1.87 <sup>c</sup>   | 36.19±2.97 <sup>a</sup>               | 8.47±0.40 <sup>d</sup>    | -                        | 8.95±1.05 <sup>d</sup>    |
| 7            | Methyl<br>2-methyl-2-butenolate | 417, 1.290            | 864.58          | -                          | 15.38±1.34 <sup>a</sup>   | -                         | -                                     | -                         | -                        | -                         |
| 8            | Ethyl caproate                  | 663, 1.290            | 1001.8          | 159.73±1.36 <sup>b</sup>   | 22.39±3.81 <sup>d</sup>   | 1.14±0.76 <sup>d</sup>    | 110.55±0.25 <sup>c</sup>              | 1.72±0.48 <sup>d</sup>    | 264.42±41.98             | 3.43±0.26 <sup>d</sup>    |
|              |                                 |                       |                 |                            |                           |                           |                                       |                           | a                        |                           |
| 9            | Methyl caproate                 | 522, 1.250            | 924.82          | 153.20±27.75 <sup>b</sup>  | 66.50±7.17 <sup>c</sup>   | 23.91±0.71 <sup>de</sup>  | 23.29±7.10 <sup>de</sup>              | 60.00±14.80 <sup>cd</sup> | 246.00±48.82             | 14.26±0.27 <sup>e</sup>   |
|              |                                 |                       |                 |                            |                           |                           |                                       |                           | a                        |                           |
| 10           | Ethyl (2Z)-but-2-enoate         | 381, 1.280            | 843.15          | 112.42±8.84 <sup>a</sup>   | 117.43±20.77 <sup>a</sup> | 2.79±1.11 <sup>c</sup>    | 24.26±1.75 <sup>b</sup>               | -                         | 15.19±1.88 <sup>bc</sup> | 13.67±3.18 <sup>bc</sup>  |
| 11           | (Z)-hex-2-enyl acetate          | 693, 1.360            | 1018            | 12.42±0.73 <sup>c</sup>    | 36.21±4.85 <sup>b</sup>   | 107.80±11.87 <sup>a</sup> | 15.35±2.25 <sup>c</sup>               | -                         | -                        | -                         |
| 12           | Methyl acetate                  | 102, 0.620            | 500.37          | 115.74±8.84 <sup>b</sup>   | 57.67±5.47 <sup>cd</sup>  | 25.52±4.50 <sup>d</sup>   | 25.92±1.95 <sup>d</sup>               | 56.73±3.85 <sup>cd</sup>  | 273.74±57.42             | 82.96±12.89 <sup>bc</sup> |

|    |                                 |                |        |                         |                          |                         |                          |                         |                          |                         |
|----|---------------------------------|----------------|--------|-------------------------|--------------------------|-------------------------|--------------------------|-------------------------|--------------------------|-------------------------|
| a  |                                 |                |        |                         |                          |                         |                          |                         |                          |                         |
| 13 | Ethyl butyrate                  | 312, 1.110     | 802    | 85.23±2.20 <sup>b</sup> | 95.60±13.35 <sup>b</sup> | 2.07±0.73 <sup>d</sup>  | 43.20±8.88 <sup>c</sup>  | 0.22±0.03 <sup>d</sup>  | 161.26±42.65             | 11.09±1.59 <sup>d</sup> |
| a  |                                 |                |        |                         |                          |                         |                          |                         |                          |                         |
| 14 | Methyl butyrate                 | 213, 0.930     | 718.17 | 53.72±7.82 <sup>b</sup> | 48.71±12.50 <sup>b</sup> | 16.12±2.37 <sup>c</sup> | 8.88±0.42 <sup>c</sup>   | 12.82±1.98 <sup>c</sup> | 122.34±2.65 <sup>a</sup> | 42.72±4.88 <sup>b</sup> |
| 15 | Ethyl caprylate                 | 1020,<br>1.270 | 1198.5 | 23.05±0.57 <sup>c</sup> | 2.44±0.27 <sup>d</sup>   | 0.24±0.04 <sup>e</sup>  | 33.54±2.32 <sup>b</sup>  | 0.42±0.07 <sup>e</sup>  | 2.35±0.34 <sup>d</sup>   | 43.40±0.41 <sup>a</sup> |
| 16 | Propyl acetate                  | 204, 0.890     | 710.45 | 24.84±2.37 <sup>c</sup> | 73.01±11.45 <sup>a</sup> | 5.97±0.62 <sup>d</sup>  | 66.15±5.59 <sup>a</sup>  | 0.52±0.07 <sup>d</sup>  | 33.24±1.55 <sup>b</sup>  | -                       |
| 17 | Ethyl propionate                | 201, 0.890     | 707.89 | 18.92±2.06 <sup>b</sup> | 5.82±0.68 <sup>d</sup>   | -                       | 4.18±0.16 <sup>e</sup>   | -                       | 9.66±0.80 <sup>c</sup>   | 32.07±0.26 <sup>a</sup> |
| 18 | Methyl 2-ethylacrylate          | 417, 1.260     | 864.56 | -                       | -                        | -                       | -                        | 3.16±0.32 <sup>a</sup>  | -                        | -                       |
| 19 | Ethyl 2-methyl butyrate         | 390, 1.070     | 848.38 | 19.38±0.64 <sup>c</sup> | 27.06±2.00 <sup>b</sup>  | 0.05±0.03 <sup>e</sup>  | 55.81±3.47 <sup>a</sup>  | 0.04±0.00 <sup>e</sup>  | 6.93±1.36 <sup>d</sup>   | 60.64±6.06 <sup>a</sup> |
| 20 | Hexyl 2-Methyl butyrate         | 1086,<br>1.210 | 1237.6 | -                       | -                        | 0.01±0.00 <sup>d</sup>  | 1.28±0.13 <sup>a</sup>   | 0.05±0.00 <sup>d</sup>  | 0.60±0.20 <sup>b</sup>   | 0.23±0.01 <sup>c</sup>  |
| 21 | Hex-2-en-1-ol acetate           | 693,1.370      | 1018   | -                       | -                        | -                       | -                        | -                       | 49.26±3.37 <sup>a</sup>  | 30.12±1.62 <sup>b</sup> |
| 22 | Ethyl 2-hexenoate               | 744, 1.420     | 1045.4 | 22.50±0.44 <sup>a</sup> | 2.97±0.61 <sup>d</sup>   | 0.28±0.12 <sup>e</sup>  | 14.06±2.84 <sup>b</sup>  | 0.24±0.02 <sup>e</sup>  | 0.71±0.07 <sup>de</sup>  | 10.73±1.83 <sup>c</sup> |
| 23 | Methyl crotonate                | 261, 1.120     | 759.33 | 13.99±1.20 <sup>b</sup> | 47.37±5.80 <sup>a</sup>  | 43.16±5.07 <sup>a</sup> | 12.03±1.11 <sup>bc</sup> | 9.41±0.64 <sup>bc</sup> | 7.31±0.60 <sup>cd</sup>  | 2.81±0.15 <sup>d</sup>  |
| 24 | Ethyl crotonate                 | 381, 1.250     | 843.14 | -                       | -                        | -                       | -                        | 0.27±0.04 <sup>a</sup>  | -                        | -                       |
| 25 | Ethyl ( <i>E</i> )-hex-3-enoate | 681, 1.330     | 1011.5 | 11.28±0.75 <sup>a</sup> | 1.59±0.38 <sup>d</sup>   | 0.10±0.00 <sup>e</sup>  | 2.74±0.55 <sup>c</sup>   | -                       | 5.29±0.44 <sup>b</sup>   | 3.01±0.43 <sup>c</sup>  |
| 26 | Ethyl ( <i>E</i> )-2-octenoate  | 1101,<br>1.410 | 1246.7 | 9.02±1.47 <sup>b</sup>  | -                        | -                       | 7.23±0.22 <sup>b</sup>   | -                       | 0.76±0.03 <sup>c</sup>   | 15.77±3.37 <sup>a</sup> |
| 27 | Methyl octanoate                | 891, 1.280     | 1125.6 | 13.74±2.80 <sup>c</sup> | 16.13±1.81 <sup>c</sup>  | 7.45±0.35 <sup>d</sup>  | 6.57±0.47 <sup>d</sup>   | 24.64±1.24 <sup>b</sup> | 3.14±0.33 <sup>d</sup>   | 32.96±0.16 <sup>a</sup> |
| 28 | Methyl isobutyrate              | 177, 0.810     | 676.47 | -                       | -                        | -                       | -                        | 0.54±0.07 <sup>a</sup>  | -                        | -                       |
| 29 | Ethyl isobutyrate               | 255, 0.920     | 754.03 | 3.46±0.27 <sup>c</sup>  | 7.55±1.23 <sup>b</sup>   | -                       | 16.95±0.56 <sup>a</sup>  | -                       | 1.85±0.15 <sup>d</sup>   | 3.99±0.74 <sup>c</sup>  |
| 30 | ( <i>E</i> )-2-hexenoic acid,   | 597, 1.370     | 965.86 | 4.50±0.79 <sup>a</sup>  | 1.95±0.10 <sup>c</sup>   | 3.00±0.30 <sup>b</sup>  | 3.12±0.17 <sup>b</sup>   | 1.28±0.24 <sup>d</sup>  | 0.92±0.06 <sup>d</sup>   | 1.32±0.08 <sup>d</sup>  |

|    |                                                     |                |        |                        |                           |                          |                         |                        |                         |                         |
|----|-----------------------------------------------------|----------------|--------|------------------------|---------------------------|--------------------------|-------------------------|------------------------|-------------------------|-------------------------|
|    | methyl ester                                        |                |        |                        |                           |                          |                         |                        |                         |                         |
| 31 | Octyl acetate                                       | 1044,<br>1.260 | 1212.7 | 3.21±0.42 <sup>c</sup> | 5.72±0.66 <sup>b</sup>    | 4.65±0.22 <sup>bc</sup>  | 3.15±0.48 <sup>c</sup>  | 0.33±0.14 <sup>d</sup> | 2.53±0.12 <sup>cd</sup> | 17.03±3.29 <sup>a</sup> |
| 32 | ( <i>E</i> )-3-hexenyl acetate                      | 675, 1.290     | 1008.3 | 3.80±0.47 <sup>d</sup> | 12.82±0.89 <sup>b</sup>   | 2.87±0.40 <sup>d</sup>   | 13.85±0.42 <sup>b</sup> | 7.03±0.16 <sup>c</sup> | 23.19±2.31 <sup>a</sup> | 6.09±1.25 <sup>c</sup>  |
| 33 | ( <i>E,Z</i> )-2,4-Decadienoic<br>acid, ethyl ester | 1452,<br>1.500 | 1470.3 | 2.70±0.53 <sup>a</sup> | -                         | -                        | 1.47±0.10 <sup>b</sup>  | -                      | -                       | 3.39±1.36 <sup>a</sup>  |
| 34 | Heptyl acetate                                      | 870, 1.240     | 1113.7 | 3.04±0.22 <sup>c</sup> | 270.06±12.56 <sup>a</sup> | 12.19±2.50 <sup>bc</sup> | 5.82±0.53 <sup>c</sup>  | 4.62±0.23 <sup>c</sup> | 9.97±0.67 <sup>bc</sup> | 15.58±0.41 <sup>b</sup> |
| 35 | Ethyl methacrylate                                  | 291, 1.040     | 784.88 | -                      | -                         | -                        | 4.77±0.27 <sup>a</sup>  | -                      | -                       | -                       |
| 36 | Ethyl acrylate                                      | 189, 0.900     | 695.64 | -                      | -                         | -                        | 1.69±0.24 <sup>a</sup>  | -                      | -                       | 0.55±0.03 <sup>b</sup>  |
| 37 | Diethyl carbonate                                   | 291, 1.150     | 784.97 | 2.49±0.24 <sup>b</sup> | -                         | -                        | 4.81±0.25 <sup>a</sup>  | -                      | -                       | -                       |
| 38 | Ethyl heptanoate                                    | 843, 1.250     | 1098.6 | 3.48±0.37 <sup>b</sup> | 0.74±0.26 <sup>d</sup>    | -                        | 2.77±0.19 <sup>c</sup>  | -                      | 0.77±0.04 <sup>d</sup>  | 8.79±0.13 <sup>a</sup>  |
| 39 | Pentyl acetate                                      | 504, 1.160     | 914.94 | 2.84±0.14 <sup>e</sup> | 9.86±0.49 <sup>c</sup>    | 4.39±0.52 <sup>de</sup>  | 4.37±0.38 <sup>de</sup> | 5.70±0.69 <sup>d</sup> | 22.36±2.59 <sup>a</sup> | 18.59±1.53 <sup>b</sup> |
| 40 | Decyl acetate                                       | 1365,<br>1.270 | 1412.2 | -                      | 0.83±0.11 <sup>a</sup>    | 0.07±0.02 <sup>c</sup>   | -                       | -                      | -                       | 0.16±0.06 <sup>b</sup>  |
| 41 | Pentyl acetate                                      | 480, 1.150     | 901.82 | 3.27±0.63 <sup>b</sup> | 0.64±0.02 <sup>c</sup>    | -                        | 0.33±0.01 <sup>c</sup>  | -                      | 3.75±0.38 <sup>b</sup>  | 8.06±0.82 <sup>a</sup>  |
| 42 | Ethyl tiglate                                       | 549, 1.300     | 939.6  | 2.76±0.28 <sup>c</sup> | 32.76±6.28 <sup>a</sup>   | 1.13±0.19 <sup>c</sup>   | 27.78±2.25 <sup>b</sup> | 0.09±0.02 <sup>c</sup> | 0.40±0.14 <sup>c</sup>  | 0.56±0.04 <sup>c</sup>  |
| 43 | Propyl<br>( <i>E</i> )-2-methylbut-2-enoate         | 729, 1.340     | 1037.3 | -                      | 0.21±0.03 <sup>a</sup>    | -                        | -                       | -                      | -                       | -                       |
| 44 | Methyl tiglate                                      | 417, 1.290     | 864.58 | -                      | -                         | 3.45±0.21 <sup>a</sup>   | -                       | -                      | -                       | -                       |
| 45 | Ethyl ( <i>Z</i> )-hex-3-enoate                     | 672, 1.310     | 1006.7 | 2.14±0.23 <sup>a</sup> | -                         | -                        | -                       | -                      | -                       | -                       |
| 46 | Ethyl phenylacetate                                 | 1101,<br>1.910 | 1247   | 1.74±0.13 <sup>a</sup> | -                         | -                        | 0.48±0.01 <sup>c</sup>  | -                      | -                       | 0.69±0.14 <sup>b</sup>  |
| 47 | Methyl propionate                                   | 141, 0.750     | 619.3  | 1.58±0.08 <sup>d</sup> | 5.97±0.61 <sup>b</sup>    | 1.68±0.35 <sup>d</sup>   | 1.78±0.22 <sup>d</sup>  | 5.40±0.67 <sup>b</sup> | 8.93±0.65 <sup>a</sup>  | 2.86±0.28 <sup>c</sup>  |

|    |                                                   |             |        |                         |                         |                         |                         |                         |                         |                        |
|----|---------------------------------------------------|-------------|--------|-------------------------|-------------------------|-------------------------|-------------------------|-------------------------|-------------------------|------------------------|
| 48 | Methyl ( <i>E</i> )-2-octenoate                   | 972, 1.420  | 1171.5 | 2.04±0.03 <sup>a</sup>  | 0.33±0.05 <sup>de</sup> | 0.36±0.03 <sup>cd</sup> | 0.32±0.02 <sup>de</sup> | 0.48±0.16 <sup>c</sup>  | 0.21±0.08 <sup>c</sup>  | 0.82±0.02 <sup>b</sup> |
| 49 | 2-Buten-1-ol, acetate                             | 351, 1.190  | 825.25 | -                       | 0.44±0.04 <sup>b</sup>  | 1.82±0.52 <sup>a</sup>  | 0.55±0.02 <sup>b</sup>  | -                       | -                       | -                      |
| 50 | Methyl heptanoate                                 | 708, 1.230  | 1026   | 2.89±0.29 <sup>bc</sup> | 3.32±0.38 <sup>b</sup>  | 0.65±0.12 <sup>d</sup>  | 0.95±0.04 <sup>d</sup>  | 2.88±0.08 <sup>bc</sup> | 2.59±0.61 <sup>c</sup>  | 4.40±0.16 <sup>a</sup> |
| 51 | Methyl 2-methylbutyrate                           | 279, 0.960  | 774.56 | 1.42±0.21 <sup>e</sup>  | 7.00±0.74 <sup>b</sup>  | 2.58±0.38 <sup>d</sup>  | 14.56±0.86 <sup>a</sup> | 1.57±0.05 <sup>e</sup>  | 6.80±0.90 <sup>b</sup>  | 4.14±0.19 <sup>c</sup> |
| 52 | Propyl 2-Methylbutyrate                           | 561, 1.130  | 946.06 | -                       | -                       | -                       | 0.35±0.03 <sup>a</sup>  | -                       | -                       | 0.18±0.03 <sup>b</sup> |
| 53 | ( <i>E,Z</i> )-2,4-Decadienoic acid, methyl ester | 1341, 1.520 | 1396.5 | 0.80±0.04 <sup>b</sup>  | 0.33±0.03 <sup>cd</sup> | 0.17±0.01 <sup>de</sup> | 0.41±0.01 <sup>c</sup>  | 1.40±0.25 <sup>a</sup>  | -                       | 1.37±0.13 <sup>a</sup> |
| 54 | Methyl valerate                                   | 348, 1.090  | 823.41 | 1.10±0.08 <sup>c</sup>  | 0.90±0.07 <sup>c</sup>  | 0.28±0.07 <sup>d</sup>  | -                       | -                       | 6.68±0.07 <sup>a</sup>  | 3.72±0.64 <sup>b</sup> |
| 55 | Methyl ( <i>3E</i> )-3-hexenoate                  | 537, 1.280  | 933.03 | 0.82±0.03 <sup>b</sup>  | 1.04±0.18 <sup>a</sup>  | 0.64±0.02 <sup>c</sup>  | -                       | 0.17±0.00 <sup>e</sup>  | 0.16±0.01 <sup>e</sup>  | 0.49±0.03 <sup>d</sup> |
| 56 | Phenethyl acetate                                 | 1122, 1.890 | 1259.5 | 0.45±0.09 <sup>c</sup>  | 0.84±0.02 <sup>a</sup>  | 0.12±0.01 <sup>d</sup>  | 0.51±0.04 <sup>cb</sup> | 0.11±0.00 <sup>d</sup>  | 0.18±0.00 <sup>d</sup>  | 0.54±0.05 <sup>b</sup> |
| 57 | Hexyl butyrate                                    | 1008, 1.250 | 1191.7 | 0.63±0.01 <sup>d</sup>  | 0.56±0.02 <sup>d</sup>  | 0.22±0.04 <sup>e</sup>  | 0.50±0.01 <sup>d</sup>  | 1.52±0.07 <sup>c</sup>  | 3.86±0.11 <sup>b</sup>  | 5.19±0.15 <sup>a</sup> |
| 58 | Butyl butyrate                                    | 654, 1.190  | 996.9  | -                       | -                       | -                       | -                       | -                       | 0.42±0.04 <sup>a</sup>  | 0.14±0.04 <sup>b</sup> |
| 59 | Ethyl benzoate                                    | 975, 1.790  | 1173.4 | 0.34±0.03 <sup>b</sup>  | 0.74±0.03 <sup>a</sup>  | -                       | -                       | -                       | -                       | 0.22±0.02 <sup>c</sup> |
| 60 | Methyl benzoate                                   | 840, 1.840  | 1097.3 | -                       | -                       | 0.05±0.00 <sup>c</sup>  | -                       | -                       | 0.60±0.01 <sup>a</sup>  | 0.17±0.02 <sup>b</sup> |
| 61 | Dimethyl carbonate                                | 135, 0.790  | 609.85 | -                       | -                       | -                       | -                       | 1.22±0.14 <sup>a</sup>  | -                       | -                      |
| 62 | ( <i>Z</i> )-4-Octenoic acid, ethyl ester         | 1005, 1.340 | 1190   | 0.32±0.02 <sup>c</sup>  | -                       | -                       | 0.60±0.03 <sup>b</sup>  | -                       | 0.08±0.01 <sup>cd</sup> | 1.65±0.26 <sup>a</sup> |
| 63 | ( <i>Z</i> )-4-Decenoic acid, methyl ester        | 1206, 1.370 | 1309.9 | -                       | -                       | -                       | 0.05±0.01 <sup>c</sup>  | 0.12±0.01 <sup>b</sup>  | -                       | 0.49±0.07 <sup>a</sup> |
| 64 | ( <i>E</i> )-2-Heptenoic acid, ethyl ester        | 930, 1.400  | 1147.7 | -                       | -                       | -                       | 0.04±0.00 <sup>b</sup>  | -                       | -                       | 0.09±0.00 <sup>a</sup> |

|    |                                           |                |        |                        |                        |                        |                        |                        |                         |                        |
|----|-------------------------------------------|----------------|--------|------------------------|------------------------|------------------------|------------------------|------------------------|-------------------------|------------------------|
| 65 | Ethyl ( <i>E</i> )-pent-2-enoate          | 567, 1.350     | 949.46 | 0.43±0.01 <sup>a</sup> | -                      | -                      | -                      | -                      | -                       | 0.09±0.00 <sup>b</sup> |
| 66 | Ethyl decanoate                           | 1341,<br>1.270 | 1396.3 | 0.17±0.00 <sup>c</sup> | -                      | -                      | 0.40±0.08 <sup>b</sup> | -                      | -                       | 0.84±0.01 <sup>a</sup> |
| 67 | Methyl decanoate                          | 1230,<br>1.290 | 1325.2 | -                      | -                      | 0.16±0.01 <sup>b</sup> | 0.13±0.02 <sup>c</sup> | 0.44±0.04 <sup>a</sup> | -                       | -                      |
| 68 | 4-Octenoic acid, methyl ester             | 876, 1.340     | 1117.2 | 0.26±0.01 <sup>c</sup> | -                      | 0.40±0.03 <sup>b</sup> | 0.20±0.02 <sup>d</sup> | 0.28±0.00 <sup>c</sup> | 0.10±0.00 <sup>e</sup>  | 0.61±0.05 <sup>a</sup> |
| 69 | ( <i>Z</i> )-3-Octenoic acid, ethyl ester | 1026,<br>1.350 | 1202   | -                      | -                      | -                      | 0.16±0.00 <sup>b</sup> | -                      | -                       | 0.63±0.03 <sup>a</sup> |
| 70 | Propyl butyrate                           | 474, 1.130     | 898.4  | 0.23±0.02 <sup>c</sup> | 0.24±0.03 <sup>c</sup> | 0.03±0.00 <sup>d</sup> | -                      | -                      | 0.84 ±0.07 <sup>b</sup> | 1.00±0.04 <sup>a</sup> |
| 71 | Propyl hexanoate                          | 837, 1.230     | 1095.3 | 0.14±0.02 <sup>c</sup> | -                      | -                      | -                      | -                      | 0.22±0.01 <sup>b</sup>  | 1.16±0.12 <sup>a</sup> |
| 72 | 1-Methylethyl hexanoate                   | 732,1.130      | 1038.8 | -                      | -                      | -                      | -                      | -                      | 0.56±0.10 <sup>a</sup>  | 0.12±0.02 <sup>b</sup> |
| 73 | 2-Methylpropyl hexanoate                  | 936,1.200      | 1151   | -                      | -                      | -                      | -                      | -                      | -                       | 0.06±0.00 <sup>a</sup> |
| 74 | Hexyl hexanoate                           | 1326,<br>1.270 | 1386.7 | -                      | -                      | 0.04±0.00 <sup>c</sup> | 0.29±0.02 <sup>c</sup> | 0.67±0.10 <sup>b</sup> | 0.73±0.03 <sup>b</sup>  | 2.78±0.11 <sup>a</sup> |
| 75 | Hex-5-enoic acid, ethyl ester             | 669,1.310      | 1005.1 | -                      | -                      | -                      | -                      | -                      | -                       | 0.10±0.00 <sup>a</sup> |
| 76 | Hexyl pentanoate                          | 1173,1.26<br>0 | 1289.5 | -                      | -                      | -                      | -                      | -                      | -                       | 0.04±0.00 <sup>a</sup> |
| 77 | Hexyl caprylate                           | 1614,1.28<br>0 | 1583.2 | -                      | -                      | -                      | -                      | -                      | -                       | 0.01±0.00 <sup>a</sup> |
| 78 | 2-Pentenoic acid, ethyl                   | 567, 1.340     | 949.45 | -                      | -                      | -                      | 0.17±0.01 <sup>a</sup> | -                      | -                       | -                      |

|    |                                                  |                |        |   |                        |                        |                        |   |                        |                        |
|----|--------------------------------------------------|----------------|--------|---|------------------------|------------------------|------------------------|---|------------------------|------------------------|
|    | ester                                            |                |        |   |                        |                        |                        |   |                        |                        |
| 79 | Butanoic acid, 2-methyl-,<br>2-methylbutyl ester | 855, 1.150     | 1105.2 | - | -                      | -                      | 0.13±0.01 <sup>a</sup> | - | -                      | -                      |
| 80 | Butanoic acid,<br>2-methylpropyl ester           | 579,1.130      | 955.89 | - | -                      | -                      | -                      | - | -                      | 0.10±0.00 <sup>a</sup> |
| 81 | Dodecanoic acid, ethyl<br>ester                  | 1632,1.27<br>0 | 1595.9 | - | -                      | -                      | -                      | - | -                      | 0.03±0.00 <sup>a</sup> |
| 82 | (Z)-3-Octen-1-ol, acetate                        | 1020,<br>1.340 | 1198.5 | - | 0.35±0.03 <sup>a</sup> | 0.23±0.03 <sup>b</sup> | -                      | - | -                      | -                      |
| 83 | (Z)-3-Octenoic acid,<br>methyl ester             | 900, 1.380     | 1130.8 | - | -                      | 0.03±0.00 <sup>b</sup> | -                      | - | -                      | 0.07±0.00 <sup>a</sup> |
| 84 | (Z)-4-Decenoic acid,<br>ethyl ester              | 1317,1.34<br>0 | 1381   | - | -                      | -                      | -                      | - | -                      | 0.07±0.00 <sup>a</sup> |
| 85 | 5-Hexenoic acid, methyl<br>ester                 | 498,1.260      | 911.71 | - | -                      | -                      | -                      | - | -                      | 0.03±0.00 <sup>a</sup> |
| 86 | 4-Decenoic acid, methyl<br>ester                 | 1206,<br>1.370 | 1309.9 | - | 0.27±0.01 <sup>a</sup> | -                      | -                      | - | -                      | -                      |
| 87 | 4-Hexen-1-ol, acetate                            | 1038,1.36<br>0 | 1209.2 | - | -                      | -                      | -                      | - | 0.10±0.00 <sup>a</sup> | -                      |
| 88 | Methyl (Z)-hex-3-enoate                          | 537, 1.290     | 933.03 | - | 0.26±0.10 <sup>a</sup> | -                      | 0.06±0.01 <sup>b</sup> | - | -                      | -                      |
| 89 | Ethyl 3-(methylthio)-<br>(E)-2-propenoate        | 990, 1.980     | 1181.9 | - | 0.22±0.05 <sup>a</sup> | -                      | -                      | - | -                      | 0.24±0.03 <sup>a</sup> |
| 90 | Methyl 3-(methylthio)                            | 846, 2.040     | 1100.6 | - | -                      | 0.24±0.00 <sup>a</sup> | -                      | - | -                      | -                      |

|     |                                                                            |                |        |   |                        |                        |                        |                        |   |                        |
|-----|----------------------------------------------------------------------------|----------------|--------|---|------------------------|------------------------|------------------------|------------------------|---|------------------------|
|     | -( <i>E</i> )-2-propenoate                                                 |                |        |   |                        |                        |                        |                        |   |                        |
| 91  | 3-(Methylthio) propanoic<br>acid ethyl ester                               | 849,1.730      | 1102.2 | - | -                      | -                      | -                      | -                      | - | 0.71±0.03 <sup>a</sup> |
| 92  | Methyl<br>3-methylthiopropionate                                           | 708,1.810      | 1026.3 | - | -                      | -                      | -                      | -                      | - | 0.23±0.03 <sup>a</sup> |
| 93  | 3-Methyl-3-buten-1-ol,<br>acetate                                          | 450, 1.210     | 884.17 | - | 1.20±0.02 <sup>a</sup> | -                      | -                      | -                      | - | -                      |
| 94  | 2-Methylbut-2-en-1-yl<br>acetate                                           | 519, 1.300     | 923.21 | - | -                      | 1.74±0.06 <sup>a</sup> | -                      | -                      | - | -                      |
| 95  | γ-Butyrolactone                                                            | 504, 2.680     | 915.77 | - | -                      | -                      | 1.30±0.31 <sup>a</sup> | -                      | - | -                      |
| 96  | Prenylacetate                                                              | 519, 1.280     | 923.2  | - | -                      | -                      | -                      | 0.28±0.02 <sup>a</sup> | - | -                      |
| 97  | ( <i>Z</i> )-3-Decen-1-yl acetate                                          | 1332,<br>1.350 | 1390.6 | - | 1.06±0.18 <sup>a</sup> | -                      | -                      | -                      | - | -                      |
| 98  | Hexyl tiglate                                                              | 1242,<br>1.380 | 1332.9 | - | -                      | 0.03±0.00 <sup>a</sup> | -                      | -                      | - | -                      |
| 99  | Propanoic acid,<br>2-methyl-,<br>3-hydroxy-2,2,4-trimethy<br>lpentyl ester | 1311,<br>1.460 | 1377.2 | - | -                      | 0.37±0.05 <sup>a</sup> | -                      | -                      | - | -                      |
| 100 | Diisobutyl phthalate                                                       | 1989,<br>1.950 | 1875.7 | - | -                      | 0.26±0.04 <sup>b</sup> | -                      | -                      | - | 1.18±0.02 <sup>a</sup> |
| 101 | Butanoic acid, 2-methyl-,<br>2-methylpropyl ester                          | 666, 1.130     | 1003.4 | - | -                      | -                      | 0.27±0.02 <sup>a</sup> | -                      | - | -                      |







|         |                     |                |        |                         |                         |                        |                         |                         |                         |                         |
|---------|---------------------|----------------|--------|-------------------------|-------------------------|------------------------|-------------------------|-------------------------|-------------------------|-------------------------|
| 15      | (E)-2-Octenal       | 768, 1.450     | 1058.4 | 0.09±0.01 <sup>a</sup>  | -                       | 0.03±0.01 <sup>b</sup> | 0.09±0.03 <sup>a</sup>  | 0.06±0.02 <sup>a</sup>  | -                       | 0.03±0.01 <sup>b</sup>  |
| 16      | (E)-2-Nonenal       | 903, 1.220     | 1132.4 | -                       | -                       | 0.02±0.01 <sup>b</sup> | -                       | -                       | -                       | 0.07±0.02 <sup>a</sup>  |
| 17      | (E)-2-Hexenal       | 393, 1.370     | 850.35 | 4.42±0.21 <sup>cd</sup> | 16.66±3.13 <sup>b</sup> | 7.40±0.31 <sup>c</sup> | 22.20±0.69 <sup>a</sup> | 13.07±4.27 <sup>b</sup> | 20.51±1.14 <sup>a</sup> | 2.60±1.15 <sup>d</sup>  |
| 18      | (E)-2,4-Decadienal  | 1182,<br>1.550 | 1295   | -                       | -                       | -                      | -                       | 0.07±0.01 <sup>a</sup>  | -                       | -                       |
| 19      | Benzeneacetaldehyde | 744, 2.060     | 1045.8 | -                       | -                       | 0.14±0.09 <sup>b</sup> | 0.44±0.13 <sup>a</sup>  | -                       | -                       | 0.08±0.03 <sup>bc</sup> |
| 20      | Benzaldehyde        | 588, 1.910     | 961.23 | -                       | -                       | 0.06±0.04 <sup>b</sup> | 0.12±0.02 <sup>a</sup>  | 0.07±0.01 <sup>b</sup>  | -                       | 0.02±0.01 <sup>c</sup>  |
|         | Subtotal            |                |        | 20.37                   | 60.26                   | 33.17                  | 59.19                   | 43                      | 36.99                   | 8.4                     |
| Ketones |                     |                |        |                         |                         |                        |                         |                         |                         |                         |
| (5)     |                     |                |        |                         |                         |                        |                         |                         |                         |                         |
| 1       | Methyl heptenone    | 639, 1.380     | 988.81 | 1.16±0.24 <sup>b</sup>  | -                       | 0.36±0.04 <sup>c</sup> | 1.68±0.28 <sup>a</sup>  | 1.42±0.31 <sup>ab</sup> | 0.36±0.10 <sup>c</sup>  | 1.29±0.26 <sup>ab</sup> |
| 2       | Geranyl acetone     | 1431,<br>1.500 | 1456.3 | -                       | -                       | 0.15±0.03 <sup>a</sup> | -                       | -                       | -                       | 0.18±0.05 <sup>a</sup>  |
| 3       | 2,3-Octanedione     | 633, 1.280     | 985.47 | -                       | -                       | 0.15±0.02 <sup>a</sup> | -                       | -                       | -                       | -                       |
| 4       | 2,3-Butanedione     | 123, 0.720     | 578.34 | -                       | -                       | -                      | 0.54±0.02 <sup>a</sup>  | -                       | -                       | -                       |
| 5       | Butenone            | 123, 0.720     | 578.34 | -                       | -                       | -                      | -                       | 0.50±0.04 <sup>a</sup>  | -                       | 0.48±0.07 <sup>a</sup>  |
|         | Subtotal            |                |        | 1.16                    | 0                       | 0.66                   | 2.22                    | 1.92                    | 0.36                    | 1.95                    |
| Alkanes |                     |                |        |                         |                         |                        |                         |                         |                         |                         |
| (8)     |                     |                |        |                         |                         |                        |                         |                         |                         |                         |
| 1       | Tetradecane         | 1347,<br>0.980 | 1400   | 1.40±0.05 <sup>bc</sup> | 0.19±0.01 <sup>e</sup>  | 0.37±0.02 <sup>e</sup> | 1.25±0.05 <sup>c</sup>  | 1.82±0.07 <sup>a</sup>  | 0.69±0.07 <sup>d</sup>  | 1.52±0.29 <sup>b</sup>  |
| 2       | Hexadecane          | 1638,<br>1.010 | 1600   | 0.43±0.07 <sup>a</sup>  | -                       | -                      | -                       | -                       | -                       | -                       |

|        |                                  |                |        |                         |                        |                        |                         |                         |                        |                        |
|--------|----------------------------------|----------------|--------|-------------------------|------------------------|------------------------|-------------------------|-------------------------|------------------------|------------------------|
| 3      | Tridecane                        | 1191,<br>0.950 | 1300   | 0.41±0.08 <sup>bc</sup> | 0.15±0.01 <sup>d</sup> | 0.15±0.02 <sup>d</sup> | 0.49±0.15 <sup>ab</sup> | 0.32±0.08 <sup>c</sup>  | 0.34±0.03 <sup>c</sup> | 0.57±0.01 <sup>a</sup> |
| 4      | 3-Methyl-tridecane               | 1302,<br>0.970 | 1371.1 | -                       | -                      | 0.03±0.00 <sup>b</sup> | 0.04±0.01 <sup>a</sup>  | -                       | -                      | -                      |
| 5      | Undecane                         | 846, 0.890     | 1100   | -                       | 0.23±0.03 <sup>a</sup> | 0.07±0.00 <sup>c</sup> | 0.14±0.03 <sup>b</sup>  | 0.10±0.01 <sup>bc</sup> | 0.13±0.03 <sup>b</sup> | -                      |
| 6      | Heptadecane                      | 1773,<br>1.020 | 1700   | -                       | -                      | 0.04±0.00 <sup>b</sup> | -                       | -                       | -                      | 0.18±0.12 <sup>a</sup> |
| 7      | 2,6,10-Trimethyl-Dodeca<br>ne    | 1311,<br>0.940 | 1376.9 | -                       | -                      | 0.03±0.00 <sup>b</sup> | -                       | -                       | -                      | 0.07±0.00 <sup>a</sup> |
| 8      | Decane                           | 660, 0.870     | 1000   | -                       | -                      | 0.02±0.00 <sup>a</sup> | -                       | -                       | -                      | -                      |
|        | Subtotal                         |                |        | 2.24                    | 0.57                   | 0.71                   | 1.92                    | 2.24                    | 1.16                   | 2.34                   |
| Others |                                  |                |        |                         |                        |                        |                         |                         |                        |                        |
| (7)    |                                  |                |        |                         |                        |                        |                         |                         |                        |                        |
| 1      | <i>o</i> -Xylene                 | 429, 1.180     | 871.65 | -                       | 2.79±0.12 <sup>a</sup> | 1.33±0.03 <sup>b</sup> | -                       | -                       | 2.70±0.26 <sup>a</sup> | -                      |
| 2      | <i>p</i> -Xylene                 | 426, 1.180     | 869.87 | -                       | -                      | -                      | 10.35±0.13 <sup>a</sup> | -                       | -                      | 8.55±0.56 <sup>b</sup> |
| 3      | 1,2,3-Trimethyl-Benzene          | 648, 1.340     | 993.7  | -                       | -                      | 0.19±0.02 <sup>a</sup> | -                       | -                       | -                      | -                      |
| 4      | 4-Ethyl-1,2-dimethyl-Ben<br>zene | 819,1.370      | 1085.7 | -                       | -                      | -                      | -                       | -                       | -                      | 0.09±0.01 <sup>a</sup> |
| 5      | 1-Ethyl-4-methylbenzene          | 591, 1.270     | 962.52 | -                       | -                      | -                      | 0.77±0.04 <sup>a</sup>  | 0.65±0.03 <sup>b</sup>  | -                      | -                      |
| 6      | <i>o</i> -Cymene                 | 804, 1.350     | 1077.7 | -                       | -                      | 0.06±0.00 <sup>a</sup> | -                       | -                       | -                      | -                      |
| 7      | Denderalasin                     | 1608,<br>1.410 | 1579   | -                       | -                      | 0.23±0.01 <sup>a</sup> | -                       | -                       | -                      | -                      |
|        | Subtotal                         |                |        | 0                       | 2.79                   | 1.81                   | 11.12                   | 0.65                    | 2.7                    | 8.64                   |

|       |         |         |        |         |        |         |        |
|-------|---------|---------|--------|---------|--------|---------|--------|
| Total | 1877.71 | 1799.46 | 608.53 | 1158.07 | 568.84 | 2825.59 | 657.67 |
|-------|---------|---------|--------|---------|--------|---------|--------|

---

<sup>1</sup>R.T. refers to the retention time. <sup>2</sup>RI refers to the calculated retention index. <sup>3</sup>Data are means  $\pm$  SD of three replications. <sup>4</sup>“-” represents no data.
